# Supplementary material for: The Association between Gut Microbiota and Uremia of Chronic Kidney Disease
Source: PubMed Central journal article supplement (PMC7355700; doi:10.3390/microorganisms8060907), 2020-06-16
Supplement: microorganisms-08-00907-s001.pdf [file microorganisms-08-00907-s001.pdf]

## Supplementary materials

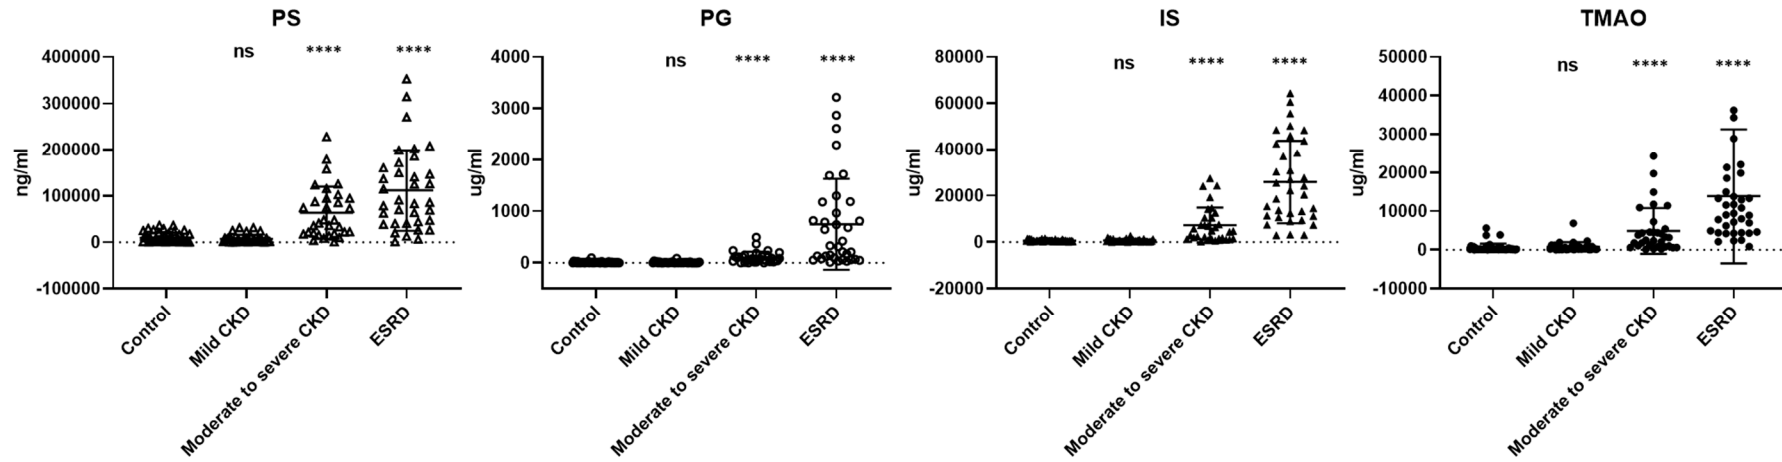

**Figure S1. Serum levels of four uremic metabolites according to CKD groups.** The p-values of multiple comparison in each CKD group compared to control are plotted on the graph (ns, not significant; \*\*\*\*,  $p < 0.001$ ). Abbreviations: PS, P-cresyl sulfate; PG, P-cresyl glucuronide; IS, indoxyl sulfate; TMAO, Trimethylamine N-oxide; CKD, chronic kidney disease; ESRD, end stage renal disease.

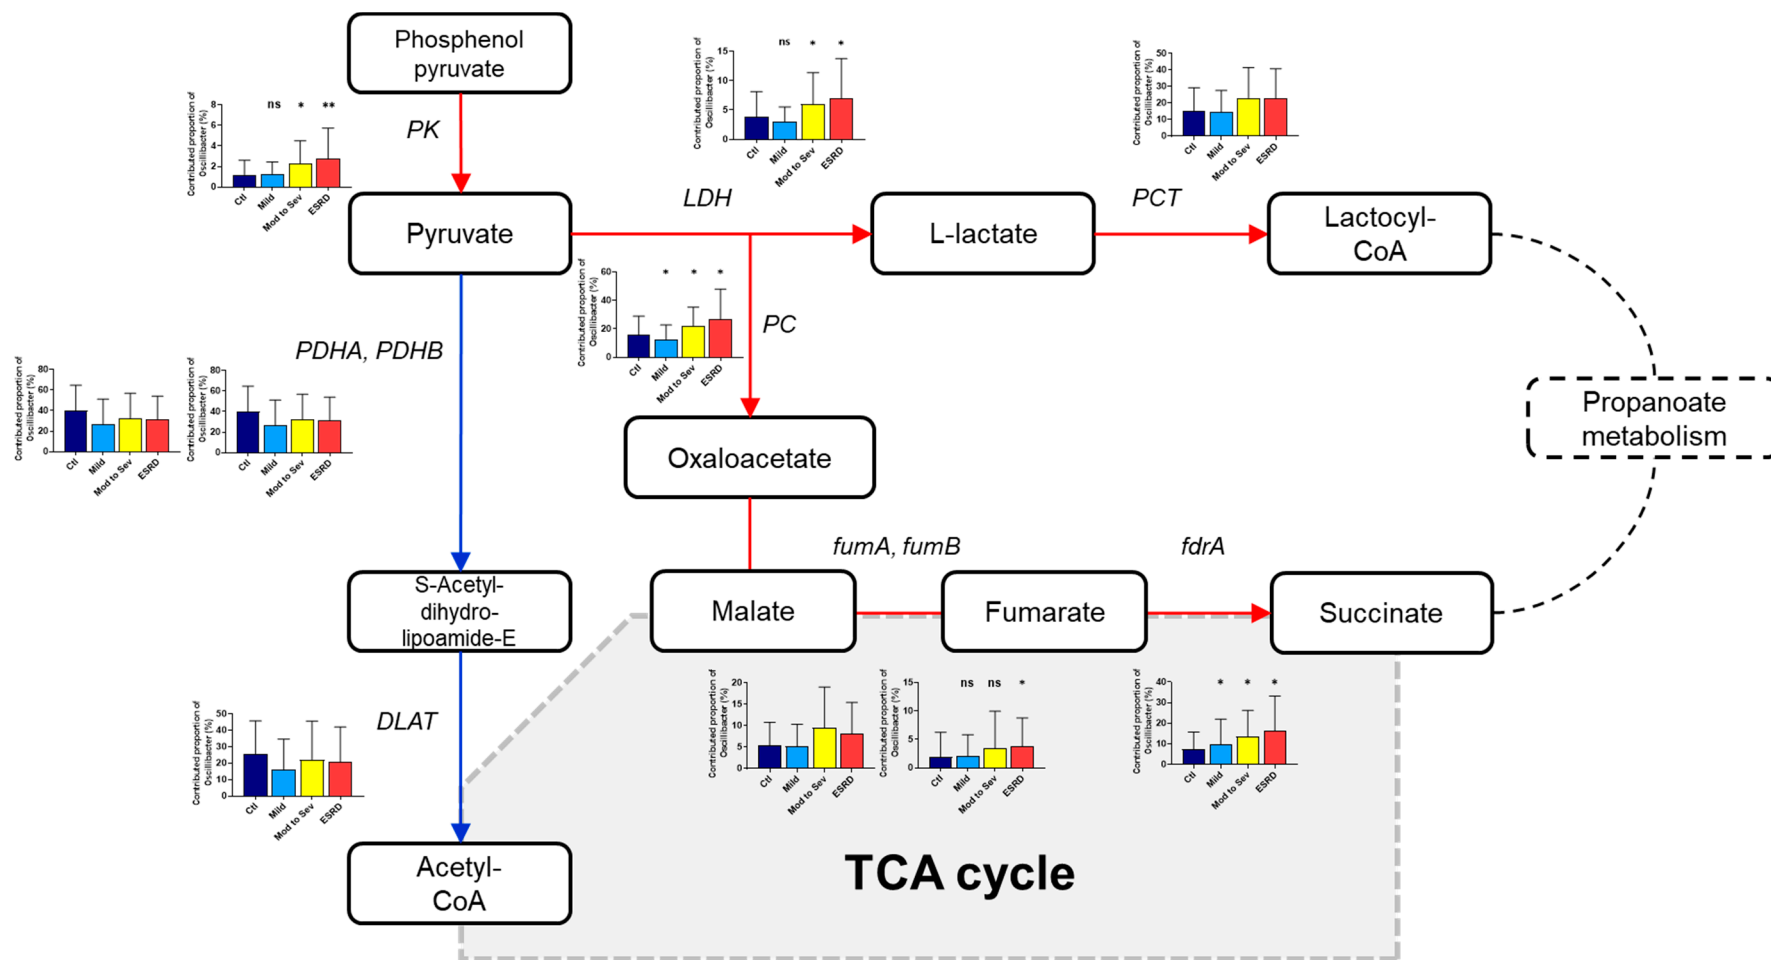

**Figure S2.** Hypothetical pathway diagram using the KEGG module associated with changes in *Oscillibacter* contribution according to the renal function. The red and blue arrows represent schematic pathways that increase or decrease the contribution of *Oscillibacter* as renal function deteriorates, respectively. Small bar charts represent comparison of contribution of *Oscillibacter* in each orthologs by groups. Asterisks in bar charts indicate significance (q-value) compared to control group. ns, not significant; \*,  $q < 0.05$ ; \*\*,  $q < 0.005$ . Abbreviation: KEGG, Kyoto Encyclopedia of Genes and Genomes.

**Table S1.** Differentially represented KEGG categories predicted by PICRUSt (level 3) in 4 groups.

| Level_1                        | Level_2                                     | Level_3                                   | p-values* | p-values*<br>(corrected) |
|--------------------------------|---------------------------------------------|-------------------------------------------|-----------|--------------------------|
| Metabolism                     | Metabolism of Cofactors and Vitamins        | Riboflavin metabolism                     | 5.93E-05  | 0.019438                 |
| Metabolism                     | Carbohydrate Metabolism                     | Pyruvate metabolism                       | 0.000219  | 0.02393                  |
| Metabolism                     | Energy Metabolism                           | Methane metabolism                        | 0.000153  | 0.025037                 |
| Metabolism                     | Others                                      | Others_Unclassified                       | 0.000372  | 0.030475                 |
| Metabolism                     | Biosynthesis of Other Secondary Metabolites | Flavonoid biosynthesis                    | 0.00109   | 0.051083                 |
| Metabolism                     | Metabolism of Cofactors and Vitamins        | Nicotinate and nicotinamide metabolism    | 0.001352  | 0.055414                 |
| Metabolism                     | Nucleotide Metabolism                       | Purine metabolism                         | 0.001539  | 0.05607                  |
| Metabolism                     | Xenobiotics Biodegradation and Metabolism   | Chloroalkane and chloroalkene degradation | 0.001039  | 0.056804                 |
| Genetic Information Processing | Translation                                 | Ribosome biogenesis in eukaryotes         | 0.000947  | 0.062124                 |
| Cellular Processes             | Cell Growth and Death                       | Apoptosis                                 | 0.001973  | 0.064699                 |
| Metabolism                     | Biosynthesis of Other Secondary Metabolites | Isoquinoline alkaloid biosynthesis        | 0.002609  | 0.077794                 |
| Metabolism                     | Lipid Metabolism                            | Glycerophospholipid metabolism            | 0.003932  | 0.085988                 |
| Metabolism                     | Carbohydrate Metabolism                     | Glycolysis / Gluconeogenesis              | 0.003918  | 0.091784                 |
| Metabolism                     | Metabolism of Terpenoids and Polyketides    | Tetracycline biosynthesis                 | 0.005625  | 0.092257                 |
| Human Diseases                 | Infectious Diseases                         | Amoebiasis                                | 0.00342   | 0.093481                 |
| Metabolism                     | Energy Metabolism                           | Photosynthesis proteins                   | 0.004608  | 0.094461                 |
| Metabolism                     | Energy Metabolism                           | Photosynthesis                            | 0.005498  | 0.094917                 |
| Metabolism                     | Metabolism of Cofactors and Vitamins        | Folate biosynthesis                       | 0.006179  | 0.096513                 |

|                                  |                                             |                                                        |          |          |
|----------------------------------|---------------------------------------------|--------------------------------------------------------|----------|----------|
| Metabolism                       | Carbohydrate metabolism                     | Carbohydrate metabolism_Unclassified                   | 0.003827 | 0.096552 |
| Metabolism                       | Lipid Metabolism                            | Arachidonic acid metabolism                            | 0.005369 | 0.097833 |
| Metabolism                       | Glycan Biosynthesis and Metabolism          | Lipopolysaccharide biosynthesis                        | 0.005158 | 0.099522 |
| Organismal Systems               | Digestive System                            | Carbohydrate digestion and absorption                  | 0.007076 | 0.105495 |
| Metabolism                       | Glycan Biosynthesis and Metabolism          | Various types of N-glycan biosynthesis                 | 0.00766  | 0.109233 |
| Genetic Information Processing   | Translation                                 | Ribosome Biogenesis                                    | 0.009099 | 0.114785 |
| Metabolism                       | Metabolism of Other Amino Acids             | Phosphonate and phosphinate metabolism                 | 0.008816 | 0.11567  |
| Metabolism                       | Amino Acid Metabolism                       | Valine, leucine and isoleucine biosynthesis            | 0.008553 | 0.116888 |
| Metabolism                       | Lipid Metabolism                            | Glycerolipid metabolism                                | 0.013993 | 0.120781 |
| Cellular Processes and Signaling | Other transporters                          | Other transporters_Unclassified                        | 0.015123 | 0.120983 |
| Metabolism                       | Amino acid metabolism                       | Amino acid metabolism_Unclassified                     | 0.011816 | 0.121111 |
| Metabolism                       | Xenobiotics Biodegradation and Metabolism   | Xylene degradation                                     | 0.013827 | 0.122576 |
| Metabolism                       | Metabolism of Terpenoids and Polyketides    | Carotenoid biosynthesis                                | 0.014993 | 0.122944 |
| Genetic Information Processing   | Replication and Repair                      | Chromosome                                             | 0.011691 | 0.123698 |
| Metabolism                       | Biosynthesis of Other Secondary Metabolites | Tropane, piperidine and pyridine alkaloid biosynthesis | 0.014779 | 0.124298 |
| Metabolism                       | Xenobiotics Biodegradation and Metabolism   | Styrene degradation                                    | 0.012912 | 0.124566 |
| Metabolism                       | Amino Acid Metabolism                       | Histidine metabolism                                   | 0.01265  | 0.125734 |
| Metabolism                       | Carbohydrate Metabolism                     | Pentose and glucuronate interconversions               | 0.013812 | 0.125841 |
| Metabolism                       | Glycan Biosynthesis and Metabolism          | Glycosyltransferases                                   | 0.011606 | 0.126895 |

|                                      |                                             |                                             |          |          |
|--------------------------------------|---------------------------------------------|---------------------------------------------|----------|----------|
| Cellular Processes                   | Cell Growth and Death                       | Meiosis - yeast                             | 0.013611 | 0.127555 |
| Metabolism                           | Amino Acid Metabolism                       | Arginine and proline metabolism             | 0.01129  | 0.127692 |
| Genetic Information Processing       | Folding, Sorting and Degradation            | RNA degradation                             | 0.019537 | 0.130781 |
| Metabolism                           | Xenobiotics Biodegradation and Metabolism   | Naphthalene degradation                     | 0.01883  | 0.131412 |
| Metabolism                           | Xenobiotics Biodegradation and Metabolism   | Dioxin degradation                          | 0.018059 | 0.13163  |
| Metabolism                           | Lipid Metabolism                            | Secondary bile acid biosynthesis            | 0.019291 | 0.131824 |
| Metabolism                           | Xenobiotics Biodegradation and Metabolism   | Bisphenol degradation                       | 0.017715 | 0.132056 |
| Metabolism                           | Lipid Metabolism                            | Steroid biosynthesis                        | 0.011279 | 0.132124 |
| Metabolism                           | Lipid Metabolism                            | Primary bile acid biosynthesis              | 0.018647 | 0.132958 |
| Metabolism                           | Energy Metabolism                           | Carbon fixation in photosynthetic organisms | 0.01095  | 0.133021 |
| Metabolism                           | Metabolism of Other Amino Acids             | Selenocompound metabolism                   | 0.017612 | 0.134343 |
| Metabolism                           | Biosynthesis of Other Secondary Metabolites | beta-Lactam resistance                      | 0.017336 | 0.135387 |
| Metabolism                           | Metabolism of Terpenoids and Polyketides    | Terpenoid backbone biosynthesis             | 0.023775 | 0.144409 |
| Metabolism                           | Biosynthesis of Other Secondary Metabolites | Caffeine metabolism                         | 0.022059 | 0.144709 |
| Genetic Information Processing       | Transcription related proteins              | Transcription related proteins_Unclassified | 0.022615 | 0.145442 |
| Metabolism                           | Enzyme Families                             | Protein kinases                             | 0.02444  | 0.145748 |
| Environmental Information Processing | Signaling Molecules and Interaction         | Cellular antigens                           | 0.023595 | 0.146019 |
| Metabolism                           | Lipid Metabolism                            | Linoleic acid metabolism                    | 0.026903 | 0.147068 |
| Human Diseases                       | Infectious Diseases                         | Vibrio cholerae pathogenic cycle            | 0.02518  | 0.147481 |

|                                      |                                             |                                                     |          |          |
|--------------------------------------|---------------------------------------------|-----------------------------------------------------|----------|----------|
| Metabolism                           | Metabolism of Cofactors and Vitamins        | Ubiquinone and other terpenoid-quinone biosynthesis | 0.023419 | 0.147719 |
| Environmental Information Processing | Signal Transduction                         | Phosphatidylinositol signaling system               | 0.02674  | 0.148657 |
| Human Diseases                       | Neurodegenerative Diseases                  | Alzheimer's disease                                 | 0.027697 | 0.148929 |
| Metabolism                           | Metabolism of Terpenoids and Polyketides    | Prenyltransferases                                  | 0.026729 | 0.151157 |
| Metabolism                           | Metabolism of Terpenoids and Polyketides    | Zeatin biosynthesis                                 | 0.029528 | 0.151329 |
| Organismal Systems                   | Digestive System                            | Protein digestion and absorption                    | 0.030072 | 0.151748 |
| Metabolism                           | Glycan Biosynthesis and Metabolism          | N-Glycan biosynthesis                               | 0.028708 | 0.151876 |
| Genetic Information Processing       | Folding, Sorting and Degradation            | Chaperones and folding catalysts                    | 0.029295 | 0.152521 |
| Metabolism                           | Lipid Metabolism                            | Fatty acid elongation in mitochondria               | 0.026607 | 0.153109 |
| Genetic Information Processing       | Transcription                               | Basal transcription factors                         | 0.033423 | 0.158882 |
| Metabolism                           | Biosynthesis of Other Secondary Metabolites | Phenylpropanoid biosynthesis                        | 0.034105 | 0.159805 |
| Organismal Systems                   | Environmental Adaptation                    | Circadian rhythm - plant                            | 0.032382 | 0.160927 |
| Metabolism                           | Metabolism of Other Amino Acids             | D-Arginine and D-ornithine metabolism               | 0.033405 | 0.161128 |
| Metabolism                           | Amino Acid Metabolism                       | Amino acid related enzymes                          | 0.033037 | 0.161734 |
| Genetic Information Processing       | Translation                                 | Ribosome                                            | 0.037007 | 0.164032 |
| Metabolism                           | Glycan Biosynthesis and Metabolism          | Lipopolysaccharide biosynthesis proteins            | 0.036558 | 0.164259 |
| Cellular Processes and Signaling     | Germination                                 | Germination_Unclassified                            | 0.036539 | 0.166456 |
| Organismal Systems                   | Excretory System                            | Proximal tubule bicarbonate reclamation             | 0.036517 | 0.168696 |

|                                      |                                           |                                       |          |          |
|--------------------------------------|-------------------------------------------|---------------------------------------|----------|----------|
| Metabolism                           | Carbohydrate Metabolism                   | Pentose phosphate pathway             | 0.041547 | 0.170343 |
| Cellular Processes and Signaling     | Cell division                             | Cell division_Unclassified            | 0.040196 | 0.171226 |
| Metabolism                           | Carbohydrate Metabolism                   | Ascorbate and aldarate metabolism     | 0.041241 | 0.17123  |
| Organismal Systems                   | Immune System                             | RIG-I-like receptor signaling pathway | 0.039921 | 0.172291 |
| Metabolism                           | Xenobiotics Biodegradation and Metabolism | Nitrotoluene degradation              | 0.042549 | 0.172299 |
| Metabolism                           | Metabolism of Cofactors and Vitamins      | Vitamin B6 metabolism                 | 0.041047 | 0.172608 |
| Genetic Information Processing       | Translation                               | Aminoacyl-tRNA biosynthesis           | 0.039696 | 0.173605 |
| Metabolism                           | Nucleotide Metabolism                     | Pyrimidine metabolism                 | 0.046757 | 0.174275 |
| Human Diseases                       | Infectious Diseases                       | Tuberculosis                          | 0.044856 | 0.175151 |
| Human Diseases                       | Immune System Diseases                    | Primary immunodeficiency              | 0.046517 | 0.175376 |
| Environmental Information Processing | Signal Transduction                       | MAPK signaling pathway - yeast        | 0.046053 | 0.175646 |
| Environmental Information Processing | Signaling Molecules and Interaction       | Bacterial toxins                      | 0.045832 | 0.176856 |
| Environmental Information Processing | Signaling Molecules and Interaction       | Ion channels                          | 0.044819 | 0.177115 |
| Genetic Information Processing       | Translation                               | RNA transport                         | 0.044316 | 0.177263 |

\* *p*-values were calculated by Kruskal-Wallis test and corrected by Benjamini-Hochberg method.

**Table S2.** Contribution of *Oscillibacter* to functional orthologs associated with the pyruvate metabolism pathway.

| Functional orthologs | Enzymes | gene | Mean contribution (%) in total sample | Mean contribution (%) |          |                        |      | Kruskal-Wallis P-value |
|----------------------|---------|------|---------------------------------------|-----------------------|----------|------------------------|------|------------------------|
|                      |         |      |                                       | Control               | Mild CKD | Moderate to Severe CKD | ESRD |                        |

|        |                                                                                |                     |      |      |      |      |      |        |
|--------|--------------------------------------------------------------------------------|---------------------|------|------|------|------|------|--------|
| K00162 | pyruvate dehydrogenase E1<br>component beta subunit                            | PDHB, pdhB          | 33.1 | 40.2 | 27.0 | 32.2 | 31.4 | 0.107  |
| K00161 | pyruvate dehydrogenase E1<br>component alpha subunit                           | PDHA, pdhA          | 33.0 | 40.1 | 26.9 | 32.2 | 31.4 | 0.108  |
| K00171 | pyruvate ferredoxin oxidoreductase<br>delta subunit                            | porD                | 28.2 | 26.2 | 28.5 | 30.2 | 28.6 | 0.989  |
| K00170 | pyruvate ferredoxin oxidoreductase<br>beta subunit                             | porB                | 21.6 | 19.6 | 21.4 | 23.2 | 22.9 | 0.914  |
| K00627 | pyruvate dehydrogenase E2<br>component (dihydrolipoamide<br>acetyltransferase) | DLAT, aceF,<br>pdhC | 21.3 | 25.3 | 16.1 | 22.0 | 21.0 | 0.210  |
| K00169 | pyruvate ferredoxin oxidoreductase<br>alpha subunit                            | porA                | 19.9 | 17.5 | 19.2 | 21.5 | 22.0 | 0.865  |
| K00172 | pyruvate ferredoxin oxidoreductase<br>gamma subunit                            | porG                | 19.6 | 17.5 | 18.5 | 21.0 | 21.9 | 0.873  |
| K01958 | pyruvate kinase                                                                | PK, pyk             | 18.7 | 15.5 | 12.1 | 21.7 | 26.6 | <0.001 |
| K01026 | propionate CoA-transferase                                                     | pct                 | 18.4 | 14.9 | 14.4 | 23.1 | 22.6 | 0.031  |
| K15024 | putative phosphotransacetylase                                                 | K15024              | 14.5 | 12.6 | 12.2 | 18.2 | 15.9 | 0.236  |
| K01069 | hydroxyacylglutathione hydrolase                                               | gloB, gloC,<br>HAGH | 14.0 | 12.1 | 10.1 | 16.6 | 18.0 | 0.081  |
| K01067 | acetyl-CoA hydrolase                                                           | ACH1                | 12.8 | 7.6  | 7.6  | 14.1 | 21.8 | 0.003  |
| K01679 | fumarate hydratase, class II                                                   | fumC, FH            | 12.0 | 10.4 | 8.3  | 13.8 | 15.8 | 0.077  |
| K00128 | aldehyde dehydrogenase (NAD+)                                                  | ALDH                | 11.7 | 10.7 | 9.3  | 12.8 | 14.3 | 0.247  |
| K00244 | fumarate reductase flavoprotein<br>subunit                                     | frdA                | 11.4 | 7.5  | 9.6  | 13.5 | 16.1 | 0.005  |
| K00626 | acetyl-CoA C-acetyltransferase                                                 | atoB                | 8.0  | 6.4  | 5.7  | 10.1 | 10.2 | 0.029  |
| K01962 | acetyl-CoA carboxylase carboxyl<br>transferase subunit alpha                   | accA                | 7.9  | 5.7  | 6.4  | 10.9 | 9.3  | 0.075  |
| K02160 | acetyl-CoA carboxylase biotin<br>carboxyl carrier protein                      | accB, bccP          | 7.8  | 6.1  | 5.9  | 10.3 | 9.5  | 0.090  |



|        |                                                                         |                      |     |     |     |     |     |        |
|--------|-------------------------------------------------------------------------|----------------------|-----|-----|-----|-----|-----|--------|
| K01677 | fumarate hydratase subunit alpha                                        | fumA                 | 6.8 | 5.3 | 5.1 | 9.5 | 8.0 | 0.033  |
| K00027 | malate dehydrogenase<br>(oxaloacetate-decarboxylating)                  | ME2, sfcA,<br>maeA   | 6.8 | 5.8 | 5.0 | 8.8 | 8.1 | 0.067  |
| K01963 | acetyl-CoA carboxylase carboxyl<br>transferase subunit beta             | accD                 | 6.6 | 5.0 | 5.3 | 8.9 | 7.7 | 0.099  |
| K00016 | L-lactate dehydrogenase                                                 | LDH, ldh             | 4.8 | 3.7 | 3.0 | 6.0 | 6.9 | 0.003  |
| K04072 | acetaldehyde dehydrogenase /<br>alcohol dehydrogenase                   | adhE                 | 4.7 | 4.0 | 3.6 | 6.2 | 5.6 | 0.315  |
| K03737 | acetate kinase                                                          | ackA                 | 4.4 | 3.1 | 2.8 | 5.9 | 6.3 | <0.001 |
| K01571 | oxaloacetate decarboxylase (Na <sup>+</sup><br>extruding) subunit alpha | oadA                 | 4.2 | 3.8 | 2.9 | 5.6 | 4.6 | 0.141  |
| K00382 | dihydrolipoamide dehydrogenase                                          | DLD, lpd,<br>pdhD    | 3.4 | 2.4 | 2.1 | 4.3 | 5.1 | 0.001  |
| K01961 | acetyl-CoA carboxylase, biotin<br>carboxylase subunit                   | accC                 | 2.9 | 2.3 | 2.1 | 3.5 | 4.0 | 0.011  |
| K01678 | fumarate hydratase subunit beta                                         | fumB                 | 2.8 | 1.9 | 2.1 | 3.5 | 3.7 | 0.032  |
| K01006 | pyruvate, orthophosphate dikinase                                       | ppdK                 | 2.7 | 1.5 | 1.5 | 4.4 | 3.7 | <0.001 |
| K01759 | lactoylglutathione lyase                                                | GLO1, gloA           | 2.5 | 2.0 | 1.7 | 3.1 | 3.6 | 0.011  |
| K00625 | phosphate acetyltransferase                                             | pta                  | 2.5 | 1.5 | 1.4 | 3.4 | 3.9 | <0.001 |
| K01649 | 2-isopropylmalate synthase                                              | leuA, IMS            | 2.0 | 1.6 | 1.4 | 2.4 | 2.8 | 0.012  |
| K00925 | pyruvate carboxylase                                                    | PC, pyc              | 1.9 | 1.3 | 1.2 | 2.3 | 2.9 | <0.001 |
| K00873 | pyruvate-ferredoxin/ferredoxin<br>oxidoreductase                        | por, nifJ            | 1.8 | 1.2 | 1.2 | 2.3 | 2.8 | <0.001 |
| K00656 | formate C-acetyltransferase                                             | pflD                 | 1.4 | 1.1 | 1.0 | 1.8 | 1.9 | 0.009  |
| K00174 | 2-oxoglutarate/2-oxoacid ferredoxin<br>oxidoreductase subunit alpha     | korA, oorA,<br>oforA | 1.3 | 0.8 | 0.7 | 1.8 | 2.1 | 0.003  |
| K00175 | 2-oxoglutarate/2-oxoacid ferredoxin<br>oxidoreductase subunit beta      | korB, oorB,<br>oforB | 1.3 | 0.8 | 0.7 | 1.7 | 2.0 | 0.003  |
